# Supplementary material for: Effects of self-management programs on behavioral modification among individuals with chronic disease: A systematic review and meta-analysis of randomized trials
Source: PubMed Central journal article supplement (PMC8301623; doi:10.1371/journal.pone.0254995), 2021-07-23
Supplement: pone.0254995.s002.pdf [file pone.0254995.s002.pdf]

|                       |        |          |                                                                |       |           |                                          |        |             |       |                     |                   |                      |                        |                      |                    |               |                  |                |                    |
|-----------------------|--------|----------|----------------------------------------------------------------|-------|-----------|------------------------------------------|--------|-------------|-------|---------------------|-------------------|----------------------|------------------------|----------------------|--------------------|---------------|------------------|----------------|--------------------|
| Hibbard. 2007         | peer   | inactive | Check BP at least once a week                                  | short | Community | F for diff in change                     | 244    | 235         | 3.6   |                     |                   |                      |                        |                      |                    |               |                  |                |                    |
| Hibbard. 2007         | peer   | inactive | Check feet for cracks and calluses                             | short | Community | F for diff in change                     | 244    | 235         | 1.3   |                     |                   |                      |                        |                      |                    |               |                  |                |                    |
| Hibbard. 2007         | peer   | inactive | Keep written diary of BP readings                              | short | Community | F for diff in change                     | 244    | 235         | 0.99  |                     |                   |                      |                        |                      |                    |               |                  |                |                    |
| Hibbard. 2007         | peer   | inactive | Keep written diary of glucose levels                           | short | Community | F for diff in change                     | 244    | 235         | 1.1   |                     |                   |                      |                        |                      |                    |               |                  |                |                    |
| Hibbard. 2007         | peer   | inactive | Read about side effects when prescribed new medication         | short | Community | F for diff in change                     | 244    | 235         | 0.99  |                     |                   |                      |                        |                      |                    |               |                  |                |                    |
| Hibbard. 2007         | peer   | inactive | Read food labels for content                                   | short | Community | F for diff in change                     | 244    | 235         | 0.99  |                     |                   |                      |                        |                      |                    |               |                  |                |                    |
| Hibbard. 2007         | peer   | inactive | Take BP medications as physician recommends                    | short | Community | F for diff in change                     | 244    | 235         | 0.99  |                     |                   |                      |                        |                      |                    |               |                  |                |                    |
| Hibbard. 2007         | peer   | inactive | Taking diabetes medication                                     | short | Community | F for diff in change                     | 244    | 235         | 9.2   |                     |                   |                      |                        |                      |                    |               |                  |                |                    |
| Hibbard. 2007         | peer   | inactive | Test glucose at least three times a week                       | short | Community | F for diff in change                     | 244    | 235         | 0.99  |                     |                   |                      |                        |                      |                    |               |                  |                |                    |
| Lynch. 2014           | expert | active   | glucose testing                                                | short | Community | Independent groups (difference, p)       |        |             |       | diff. in means      | sample size(ex)   | sample size(cont)    | independent groups p   |                      |                    |               |                  |                |                    |
|                       |        |          |                                                                |       |           |                                          |        |             |       |                     |                   |                      |                        |                      |                    |               |                  |                |                    |
|                       |        |          |                                                                |       |           |                                          |        |             |       | mean(ex)            | sample size(ex)   | mean(cont.)          | sample size(cont)      | p                    |                    |               |                  |                |                    |
| Rujivathanakorn. 2011 | expert | inactive | medication taking                                              | short | Hospital  | Independent groups (means, p)            | 54.88  | 50          | 41.57 |                     |                   |                      | 46                     | 0.009                |                    |               |                  |                |                    |
| Rujivathanakorn. 2011 | expert | inactive | self monitoring                                                | short | Hospital  | Independent groups (means, p)            | 54.25  | 50          | 42.25 |                     |                   |                      | 46                     | 0.011                |                    |               |                  |                |                    |
| Forjuoh. 2014         | peer   | inactive | Check your feet                                                | short | Community | Independent groups (means, p)            | 4.61   | 101         | 5.48  |                     |                   |                      | 95                     | 0.02                 |                    |               |                  |                |                    |
|                       |        |          |                                                                |       |           |                                          |        |             |       | sample size(ex)     | sample size(cont) | independent groups p |                        |                      |                    |               |                  |                |                    |
| Lorig. 2009           | peer   | inactive | Glucose monitoring                                             | short | Community | Independent groups (Sample size, p)      | 161    | 133         | 0.001 |                     |                   |                      |                        |                      |                    |               |                  |                |                    |
| Rygg. 2012            | expert | inactive | Oral glucose lowering agent and/or insulin                     | short | Hospital  | Independent groups (Sample size, p)      | 73     | 73          | 0.891 |                     |                   |                      |                        |                      |                    |               |                  |                |                    |
| Rygg. 2012            | expert | inactive | self-inspection of feet                                        | short | Hospital  | Independent groups (Sample size, p)      | 73     | 73          | 0.147 |                     |                   |                      |                        |                      |                    |               |                  |                |                    |
| Rygg. 2012            | expert | inactive | self-monitor of blood glucose                                  | short | Hospital  | Independent groups (Sample size, p)      | 73     | 73          | 0.131 |                     |                   |                      |                        |                      |                    |               |                  |                |                    |
| Rygg. 2012            | expert | inactive | Visit, health care personnel past 3 months                     | short | Hospital  | Independent groups (Sample size, p)      | 73     | 73          | 0.106 |                     |                   |                      |                        |                      |                    |               |                  |                |                    |
|                       |        |          |                                                                |       |           |                                          |        |             |       | mean difference(ex) | difference SD(ex) | sample size(ex)      | mean difference(cont.) | difference SD(cont.) | sample size(cont)  |               |                  |                |                    |
| Lorig. 2009           | peer   | inactive | Communication with physician (0-5) †                           | short | Community | Mean change, SD difference in each group | 0.31   | 0.992       | 161   | 0.068               | 0.934             | 133                  |                        |                      |                    |               |                  |                |                    |
| Lorig. 2009           | peer   | inactive | days in hospital(past 6M)                                      | short | Community | Mean change, SD difference in each group | 0      | 4.31        | 161   | -0.143              | 1.75              | 133                  |                        |                      |                    |               |                  |                |                    |
| Lorig. 2009           | peer   | inactive | Emergency visit(past 6M)                                       | short | Community | Mean change, SD difference in each group | -0.012 | 0.742       | 161   | 0.113               | 0.885             | 133                  |                        |                      |                    |               |                  |                |                    |
| Lorig. 2009           | peer   | inactive | Patient activation (PAM) (0-100) †                             | short | Community | Mean change, SD difference in each group | 4.52   | 15.8        | 161   | 1.75                | 15.3              | 133                  |                        |                      |                    |               |                  |                |                    |
| Lorig. 2009           | peer   | inactive | physician visit(past 6M)                                       | short | Community | Mean change, SD difference in each group | 0.219  | 3.88        | 161   | -0.106              | 3.37              | 133                  |                        |                      |                    |               |                  |                |                    |
| Lorig. 2009           | peer   | inactive | Read food labels (0-4) †                                       | short | Community | Mean change, SD difference in each group | 0.119  | 0.941       | 161   | -0.18               | 0.824             | 133                  |                        |                      |                    |               |                  |                |                    |
| Dongbo. 2003          | peer   | inactive | Communication with medical doctor                              | short | Community | Mean change, SD difference in each group | 0.04   | 1.24        | 396   | 0.11                | 1.32              | 308                  |                        |                      |                    |               |                  |                |                    |
| Dongbo. 2003          | peer   | inactive | Emergency room visits                                          | short | Community | Mean change, SD difference in each group | -0.04  | 0.96        | 430   | -0.03               | 0.72              | 349                  |                        |                      |                    |               |                  |                |                    |
| Dongbo. 2003          | peer   | inactive | Hospital stays                                                 | short | Community | Mean change, SD difference in each group | -0.06  | 0.46        | 430   | 0.06                | 0.92              | 348                  |                        |                      |                    |               |                  |                |                    |
| Dongbo. 2003          | peer   | inactive | Nights in hospital                                             | short | Community | Mean change, SD difference in each group | -0.55  | 9.6         | 430   | 0.44                | 6.72              | 349                  |                        |                      |                    |               |                  |                |                    |
| Dongbo. 2003          | peer   | inactive | Physician visits                                               | short | Community | Mean change, SD difference in each group | -1.01  | 9.41        | 430   | -0.84               | 7.76              | 349                  |                        |                      |                    |               |                  |                |                    |
| Liu. 2012             | expert | inactive | Communication with medical doctor                              | long  | Community | Mean change, SD difference in each group | 0.41   | 1.54        | 98    | 0.22                | 1.09              | 78                   |                        |                      |                    |               |                  |                |                    |
| Liu. 2012             | expert | inactive | Examining feet (times per week)                                | long  | Community | Mean change, SD difference in each group | 0.46   | 2.08        | 98    | 0.45                | 2.86              | 78                   |                        |                      |                    |               |                  |                |                    |
| Lorig. 2008           | peer   | inactive | communication with physician(0-5) †                            | short | Community | Mean change, SD difference in each group | 0.324  | 1.45        | 179   | 0.144               | 1.34              | 173                  |                        |                      |                    |               |                  |                |                    |
| Lorig. 2008           | peer   | inactive | days in hospital                                               | short | Community | Mean change, SD difference in each group | 0.354  | 7.18        | 179   | -0.087              | 1.49              | 173                  |                        |                      |                    |               |                  |                |                    |
| Lorig. 2008           | peer   | inactive | emergency visits                                               | short | Community | Mean change, SD difference in each group | -0.107 | 0.82        | 179   | -0.081              | 0.943             | 173                  |                        |                      |                    |               |                  |                |                    |
| Lorig. 2008           | peer   | inactive | physician visits                                               | short | Community | Mean change, SD difference in each group | -0.028 | 3.14        | 179   | -0.064              | 2.64              | 173                  |                        |                      |                    |               |                  |                |                    |
| Lorig. 2008           | peer   | inactive | test glucose                                                   | short | Community | Mean change, SD difference in each group | 0.05   | 0.387       | 179   | 0.08                | 0.365             | 173                  |                        |                      |                    |               |                  |                |                    |
| Whittle. 2014         | peer   | active   | PAM <53 (levels 1 or 2)                                        | long  | Community | Mean change, SD difference in each group | -2.6   | 22.198      | 219   | -5.8                | 23.122            | 185                  |                        |                      |                    |               |                  |                |                    |
| Whittle. 2014         | peer   | active   | PAM ≥53 (levels 3 or 4)                                        | long  | Community | Mean change, SD difference in each group | -4.6   | 25.158      | 219   | -5                  | 24.483            | 185                  |                        |                      |                    |               |                  |                |                    |
| Huang. 2018           | expert | active   | medication adherence                                           | short | Hospital  | Mean change, SD difference in each group | 39     | 134.95      | 46    | 7.2                 | 89.68             | 44                   |                        |                      |                    |               |                  |                |                    |
| Huang. 2018           | expert | active   | RHBP                                                           | short | Hospital  | Mean change, SD difference in each group | 37.5   | 7.445484223 | 46    | 2.2                 | 7.44              | 44                   |                        |                      |                    |               |                  |                |                    |
|                       |        |          |                                                                |       |           |                                          |        |             |       | pre mean(ex)        | post mean(ex)     | sample size(ex)      | pre mean(cont.)        | post mean(cont.)     | sample size(cont.) | F for diff.   |                  |                |                    |
| Hibbard. 2007         | peer   | inactive | patient activation measure                                     | short | Community | Means, F for diff in change              | 59.9   | 64.6        | 244   | 59.8                | 63.1              | 235                  | 2.344                  |                      |                    |               |                  |                |                    |
|                       |        |          |                                                                |       |           |                                          |        |             |       |                     |                   |                      |                        |                      |                    |               |                  |                |                    |
|                       |        |          |                                                                |       |           |                                          |        |             |       | pre mean(ex)        | pre SD(ex)        | post mean(ex)        | post SD(ex)            | sample size(ex)      | pre mean(cont.)    | pre SD(cont.) | post mean(cont.) | post SD(cont.) | sample size(cont.) |
| Trouilloud. 2013      | expert | inactive | adherence to medication                                        | short | Hospital  | Means, SD in each group                  | 6.4    | 0.97        | 6.39  | 0.8                 | 99                | 6.53                 | 1.27                   | 6.69                 | 1.47               | 99            |                  |                |                    |
| Steed. 2005           | expert | inactive | Foot care                                                      | short | Hospital  | Means, SD in each group                  | 3.33   | 2.32        | 3.98  | 2.24                | 50                | 3.39                 | 2.32                   | 3.79                 | 2.41               | 50            |                  |                |                    |
| Steed. 2005           | expert | inactive | HBGM(blood glucose monitoring)                                 | short | Hospital  | Means, SD in each group                  | 3.38   | 3.1         | 5.07  | 1.97                | 50                | 2.67                 | 2.72                   | 2.94                 | 2.8                | 50            |                  |                |                    |
| Glasgow. 2012         | expert | inactive | medication adherence dichotomized                              | short | Hospital  | Means, SD in each group                  | 0.35   | 0.546       | 0.42  | 0.546               | 331               | 0.34                 | 0.46                   | 0.38                 | 0.46               | 132           |                  |                |                    |
| McGowan. 2011         | peer   | active   | Communication with physician (0-5) †                           | short | Hospital  | Means, SD in each group                  | 2.62   | 1.12        | 2.96  | 1.07                | 82                | 2.4                  | 1.02                   | 2.26                 | 1.12               | 152           |                  |                |                    |
| McGowan. 2011         | peer   | active   | Number of doctor visit                                         | short | Hospital  | Means, SD in each group                  | 3.2    | 2.09        | 2.35  | 2.3                 | 82                | 3.34                 | 2.37                   | 2.62                 | 2.31               | 152           |                  |                |                    |
| McGowan. 2011         | peer   | active   | Number of times hospitalized for 1 night or longer             | short | Hospital  | Means, SD in each group                  | 0.05   | 0.28        | 0.01  | 0.12                | 82                | 0.04                 | 0.21                   | 0.1                  | 0.34               | 152           |                  |                |                    |
| McGowan. 2011         | peer   | active   | Number of visits to emergency room                             | short | Hospital  | Means, SD in each group                  | 0.15   | 0.49        | 0.07  | 0.38                | 82                | 0.17                 | 0.48                   | 0.18                 | 0.61               | 152           |                  |                |                    |
| McGowan. 2011         | peer   | active   | Total number of nights spent in hospital                       | short | Hospital  | Means, SD in each group                  | 0.4    | 1.99        | 0.17  | 1.39                | 82                | 0.1                  | 0.5                    | 0.48                 | 2.17               | 152           |                  |                |                    |
| Baig. 2015            | peer   | active   | Testing your blood sugar the number                            | short | Community | Means, SD in each group                  | 2.08   | 2.86        | 3.95  | 2.85                | 43                | 2.07                 | 2.66                   | 4.05                 | 2.89               | 41            |                  |                |                    |
| Baig. 2015            | peer   | active   | Checking your feet                                             | short | Community | Means, SD in each group                  | 4.56   | 3.07        | 5.73  | 2.21                | 43                | 5.54                 | 2.72                   | 6.44                 | 1.69               | 41            |                  |                |                    |
| Baig. 2015            | peer   | active   | Days per week on average following eating plan over last month | short | Community | Means, SD in each group                  | 2.93   | 2.93        | 3.88  | 2.87                | 43                | 4.27                 | 2.47                   | 4.76                 | 2.57               | 41            |                  |                |                    |

|                      |          |            |                                                     |            |           |                                          |  |                     |                   |                   |                        |                      |                    |               |                  |                |                    |
|----------------------|----------|------------|-----------------------------------------------------|------------|-----------|------------------------------------------|--|---------------------|-------------------|-------------------|------------------------|----------------------|--------------------|---------------|------------------|----------------|--------------------|
| Baig. 2015           | peer     | active     | Inspecting the inside of your shoes                 | short      | Community | Means, SD in each group                  |  | 3.02                | 3.23              | 3.34              | 3.14                   | 43                   | 3.29               | 3.39          | 4.15             | 3.22           | 41                 |
| Baig. 2015           | peer     | active     | Taking insulin injections as prescribed             | short      | Community | Means, SD in each group                  |  | 6.08                | 2.06              | 6.86              | 0.53                   | 43                   | 5.89               | 2.26          | 7                | 0.001          | 41                 |
| Baig. 2015           | peer     | active     | Taking oral medications as prescribed               | short      | Community | Means, SD in each group                  |  | 6.06                | 2.25              | 6.77              | 1.19                   | 43                   | 6.69               | 1.33          | 6.86             | 0.85           | 41                 |
| Baig. 2015           | peer     | active     | Testing your blood sugar                            | short      | Community | Means, SD in each group                  |  | 2.71                | 2.92              | 3.76              | 2.7                    | 43                   | 2.49               | 2.79          | 4.46             | 2.64           | 41                 |
| Rygg. 2012           | expert   | inactive   | Patient activation (PAM)                            | short      | Hospital  | Means, SD in each group                  |  | 71                  | 14.4              | 72.8              | 14.9                   | 73                   | 72.4               | 15            | 71.7             | 16             | 73                 |
| Meng. 2016           | expert   | active     | medication adherence                                | short      | Hospital  | Means, SD in each group                  |  | 23.99               | 1.69              | 24.06             | 1.18                   | 207                  | 24.3               | 1.38          | 24.21            | 1.52           | 193                |
| Meng. 2016           | expert   | active     | response to symptom                                 | short      | Hospital  | Means, SD in each group                  |  | 10.04               | 1.65              | 10.54             | 1.6                    | 207                  | 9.95               | 2.02          | 10.56            | 1.62           | 193                |
| Meng. 2016           | expert   | active     | self monitoring                                     | short      | Hospital  | Means, SD in each group                  |  | 3.2                 | 0.54              | 3.47              | 0.47                   | 207                  | 3.22               | 0.56          | 3.47             | 0.47           | 193                |
| Meng. 2016           | expert   | active     | symptom monitoring                                  | short      | Hospital  | Means, SD in each group                  |  | 8.69                | 2.47              | 9.5               | 2.47                   | 207                  | 8.41               | 2.49          | 8.88             | 2.51           | 193                |
| Engelen. 2020        | expert   | inactive   | PAM                                                 | long       | Hospital  | Means, SD in each group                  |  | 60.6                | 14.6              | 61.9              | 15.3                   | 78                   | 56.2               | 13.9          | 56.4             | 15.7           | 96                 |
| Study name           | provider | comparison | outcomes                                            | time point | setting   | data format                              |  | sample size(ex)     | sample size(cont) | F or diff.        |                        |                      |                    |               |                  |                |                    |
| Moriyama. 2009       | expert   | inactive   | Exercise stage                                      | long       | Hospital  | F for diff in change                     |  | 42                  | 23                | 0.231             |                        |                      |                    |               |                  |                |                    |
| Hibbard. 2007        | peer     | inactive   | regular exercise                                    | short      | Community | F for diff in change                     |  | 244                 | 235               | 9.2               |                        |                      |                    |               |                  |                |                    |
|                      |          |            |                                                     |            |           |                                          |  | diff. in means      | sample size(ex)   | sample size(cont) | independent groups p   |                      |                    |               |                  |                |                    |
| Lynch. 2014          | expert   | active     | exercise                                            | short      | Community | Independent groups (difference, p)       |  | 0.6                 | 29                | 26                | 0.17                   |                      |                    |               |                  |                |                    |
| Lynch. 2014          | expert   | active     | physical activity ,kcal/wk                          | short      | Community | Independent groups (difference, p)       |  | -603.4              | 29                | 26                | 0.01                   |                      |                    |               |                  |                |                    |
|                      |          |            |                                                     |            |           |                                          |  | mean(ex)            | sample size(ex)   | mean(cont.)       | sample size(cont.)     | p                    |                    |               |                  |                |                    |
| Rujwathanakorn. 2011 | expert   | inactive   | Aerobic exercise                                    | short      | Hospital  | Independent groups (means, p)            |  | 58.23               | 50                | 37.92             | 46                     | 0.001                |                    |               |                  |                |                    |
|                      |          |            |                                                     |            |           |                                          |  | mean difference(ex) | difference SD(ex) | sample size(ex)   | mean difference(cont.) | difference SD(cont.) | sample size(cont.) |               |                  |                |                    |
| Lorig. 2009          | peer     | inactive   | Aerobic exercise, min/wk †                          | short      | Community | Mean change, SD difference in each group |  | 9.7                 | 115               | 161               | -19.2                  | 103                  | 133                |               |                  |                |                    |
| Dongbo. 2003         | peer     | inactive   | Aerobic exercise(minute/week)                       | short      | Community | Mean change, SD difference in each group |  | 27.93               | 175.51            | 406               | 2.68                   | 136.51               | 319                |               |                  |                |                    |
| Dongbo. 2003         | peer     | inactive   | Stretching and strengthening exercise(minutes/week) | short      | Community | Mean change, SD difference in each group |  | 3.54                | 64.1              | 411               | 4.44                   | 55.13                | 321                |               |                  |                |                    |
| Liu. 2012            | expert   | inactive   | Aerobic exercise (minutes/week)                     | long       | Community | Mean change, SD difference in each group |  | 23.11               | 176.71            | 98                | -18.27                 | 156.22               | 78                 |               |                  |                |                    |
| Lorig. 2008          | peer     | inactive   | Aerobic exercise(min/week) †                        | short      | Community | Mean change, SD difference in each group |  | 3.6                 | 107               | 179               | -3.47                  | 115                  | 173                |               |                  |                |                    |
| Lorig. 2008          | peer     | inactive   | stretching/strength exercise(min/week) †            | short      | Community | Mean change, SD difference in each group |  | 9.52                | 8.96              | 179               | 1.04                   | 72.7                 | 173                |               |                  |                |                    |
| Vinkers. 2014        | expert   | active     | exercise                                            | long       | Community | Mean change, SD difference in each group |  | -0.09               | 1.41              | 45                | -0.37                  | 2.29                 | 60                 |               |                  |                |                    |
| Nishimura. 2017      | expert   | inactive   | changes in exercise sunscale score                  | long       | Hospital  | Mean change, SD difference in each group |  | 0.64                | 2.66              | 30                | 0.72                   | 2.1                  | 32                 |               |                  |                |                    |
|                      |          |            |                                                     |            |           |                                          |  | pre mean(ex)        | pre SD(ex)        | post mean(ex)     | post SD(ex)            | sample size(ex)      | pre mean(cont.)    | pre SD(cont.) | post mean(cont.) | post SD(cont.) | sample size(cont.) |
| Suwankruhaan. 2013   | expert   | inactive   | Physical Activity                                   | short      | Hospital  | Means, SD in each group                  |  | 36.06               | 3.13              | 40.43             | 3.23                   | 44                   | 37.39              | 3.22          | 37.9             | 3.67           | 42                 |
| Trouilloud. 2013     | expert   | inactive   | Physical Activity                                   | short      | Hospital  | Means, SD in each group                  |  | 1.71                | 1.71              | 2.99              | 2.04                   | 99                   | 2.28               | 2.17          | 2.7              | 1.99           | 99                 |
| Steed. 2005          | expert   | inactive   | Exercise                                            | short      | Hospital  | Means, SD in each group                  |  | 2.25                | 2.21              | 3.78              | 2.04                   | 50                   | 2.8                | 2.2           | 3.02             | 2.4            | 50                 |
| Glasgow. 2012        | expert   | inactive   | Physical activity(Cals/w,range 0-10000)             | short      | Hospital  | Means, SD in each group                  |  | 3989                | 3001.912          | 4410              | 3074.686               | 331                  | 3915               | 3377.803      | 3704             | 3136.531       | 132                |
| McGowan. 2011        | peer     | active     | time doing physical exercise(0-4) †                 | short      | Hospital  | Means, SD in each group                  |  | 0.5                 | 1.18              | 0.72              | 0.41                   | 82                   | 0.75               | 0.61          | 0.74             | 0.58           | 152                |
| McGowan. 2011        | peer     | active     | time doing stretching/strengthening exercise(0-4) † | short      | Hospital  | Means, SD in each group                  |  | 0.99                | 1.2               | 1.12              | 1.04                   | 82                   | 0.96               | 1.17          | 1.04             | 1.18           | 152                |
| Baig. 2015           | peer     | active     | Participating in 30 min or more physical activity   | short      | Community | Means, SD in each group                  |  | 2.8                 | 2.77              | 3.78              | 2.88                   | 43                   | 3.05               | 2.82          | 4                | 2.65           | 41                 |
| Baig. 2015           | peer     | active     | Participating in a specific exercise session        | short      | Community | Means, SD in each group                  |  | 1.34                | 2.15              | 2.9               | 2.91                   | 43                   | 1.63               | 2.34          | 1.61             | 2.23           | 41                 |
| Sadeghian. 2016      | expert   | active     | Physical activity level                             | short      | Hospital  | Means, SD in each group                  |  | 1.47                | 0.16              | 1.583             | 1.714                  | 152                  | 1.48               | 0.2           | 1.4893           | 1.812          | 154                |
| Agarwal. 2019        | peer     | inactive   | Physical activity                                   | long       | Hospital  | Means, SD in each group                  |  | 4.56                | 0.38              | 4.73              | 1.62                   | 15                   | 3.48               | 1.33          | 3.35             | 1.6            | 20                 |
| Engelen. 2020        | expert   | inactive   | international physical activity Q_moderate          | long       | Hospital  | Means, SD in each group                  |  | 333                 | 318               | 333               | 276                    | 76                   | 373                | 364           | 336              | 300            | 92                 |
| Engelen. 2020        | expert   | inactive   | international physical activity Q_vogorous          | long       | Hospital  | Means, SD in each group                  |  | 145                 | 197               | 155               | 210                    | 76                   | 114                | 170           | 161              | 214            | 96                 |
| Engelen. 2020        | expert   | inactive   | international physical activity Q_walking           | long       | Hospital  | Means, SD in each group                  |  | 325                 | 322               | 330               | 262                    | 74                   | 339                | 319           | 354              | 340            | 92                 |
| Meng. 2016           | expert   | active     | physical activity                                   | short      | Hospital  | Means, SD in each group                  |  | 155.17              | 179.03            | 227.49            | 201.12                 | 207                  | 193.22             | 195.51        | 234.99           | 218.41         | 193                |
| Study name           | provider | comparison | outcomes                                            | time point | setting   | data format                              |  | sample size(ex)     | sample size(cont) | F or diff.        |                        |                      |                    |               |                  |                |                    |
| Hibbard. 2007        | peer     | inactive   | manage stress in a healthy way                      | short      | community | F for diff in change                     |  | 244                 | 235               | 1.3               |                        |                      |                    |               |                  |                |                    |
|                      |          |            |                                                     |            |           |                                          |  | mean(ex)            | sample size(ex)   | mean(cont.)       | sample size(cont.)     | p                    |                    |               |                  |                |                    |
| Rujwathanakorn. 2011 | expert   | inactive   | stress management                                   | short      | hospital  | Independent groups (means, p)            |  | 49                  | 50                | 47.96             | 46                     | 0.297                |                    |               |                  |                |                    |
|                      |          |            |                                                     |            |           |                                          |  | chi square          | total N           |                   |                        |                      |                    |               |                  |                |                    |
| Steed. 2005          | expert   | inactive   | smoking(% given up)                                 | short      | hospital  | Chi-squared for 2x2                      |  | 1.71                | 21                |                   |                        |                      |                    |               |                  |                |                    |
|                      |          |            |                                                     |            |           |                                          |  | ex events           | ex total N        | cont. events      | cont. total N          |                      |                    |               |                  |                |                    |
| Sadeghian. 2016      | expert   | active     | smoking                                             | short      | hospital  | Cohort 2x2 (Events)                      |  | 11                  | 152               | 15                | 154                    |                      |                    |               |                  |                |                    |
|                      |          |            |                                                     |            |           |                                          |  | pre mean(ex)        | pre SD(ex)        | post mean(ex)     | post SD(ex)            | sample size(ex)      | pre mean(cont.)    | pre SD(cont.) | post mean(cont.) | post SD(cont.) | sample size(cont.) |
| Engelen. 2020        | web base | inactive   | nicotine dependence                                 | short      | hospital  | Means, SD in each group                  |  | 3.8                 | 1.6               | 3.3               | 2.1                    | 8                    | 3.4                | 2.2           | 5                | 2.7            | 5                  |
| Study name           | provider | comparison | outcomes                                            | time point | setting   | data format                              |  | sample size(ex)     | sample size(cont) | F or diff.        |                        |                      |                    |               |                  |                |                    |
| Steed. 2005          | expert   | inactive   | smoking(% given up)                                 | short      | hospital  | Chi-squared for 2x2                      |  | 1.71                | 21                |                   |                        |                      |                    |               |                  |                |                    |
|                      |          |            |                                                     |            |           |                                          |  | ex events           | ex total N        | cont. events      | cont. total N          |                      |                    |               |                  |                |                    |
| Sadeghian. 2016      | expert   | active     | smoking                                             | short      | hospital  | Cohort 2x2 (Events)                      |  | 11                  | 152               | 15                | 154                    |                      |                    |               |                  |                |                    |

|               |          |          |                     |       |          |                         | pre mean(ex) | pre SD(ex) | post mean(ex) | post SD(ex) | sample size(ex) | pre mean(cont.) | pre SD(cont.) | post mean(cont.) | post SD(cont.) | sample size(cont.) |
|---------------|----------|----------|---------------------|-------|----------|-------------------------|--------------|------------|---------------|-------------|-----------------|-----------------|---------------|------------------|----------------|--------------------|
| Engelen, 2020 | web base | inactive | nicotine dependence | short | hospital | Means, SD in each group | 3.8          | 1.6        | 3.3           | 2.1         | 8               | 3.4             | 2.2           | 5                | 2.7            | 5                  |
